# Supplementary material for: A potential pathogenic association between periodontal disease and Crohn’s disease
Source: PubMed Central journal article supplement (PMC8675195; doi:10.1172/jci.insight.148543), 2021-12-08
Supplement: jciinsight-6-148543-s179.pdf [file jciinsight-6-148543-s179.pdf]

**A**

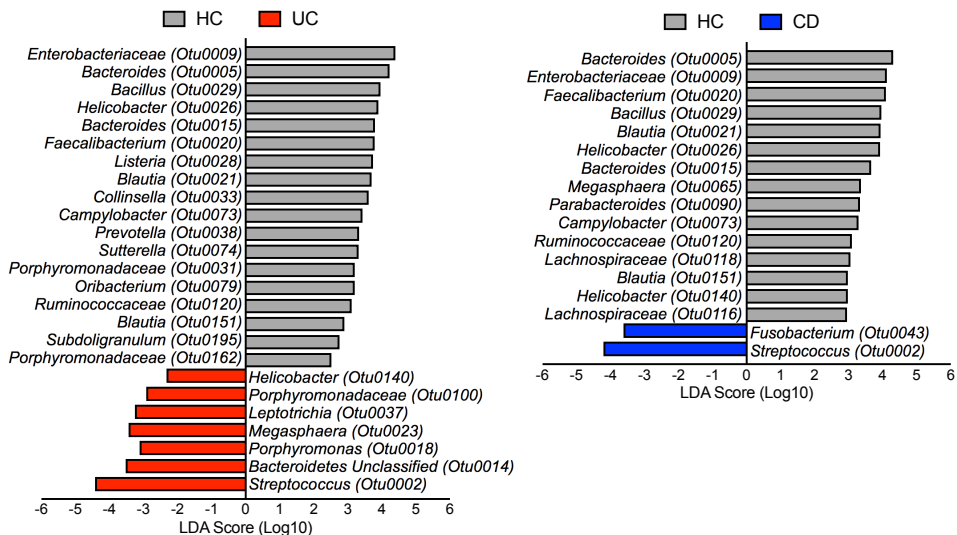

**B**

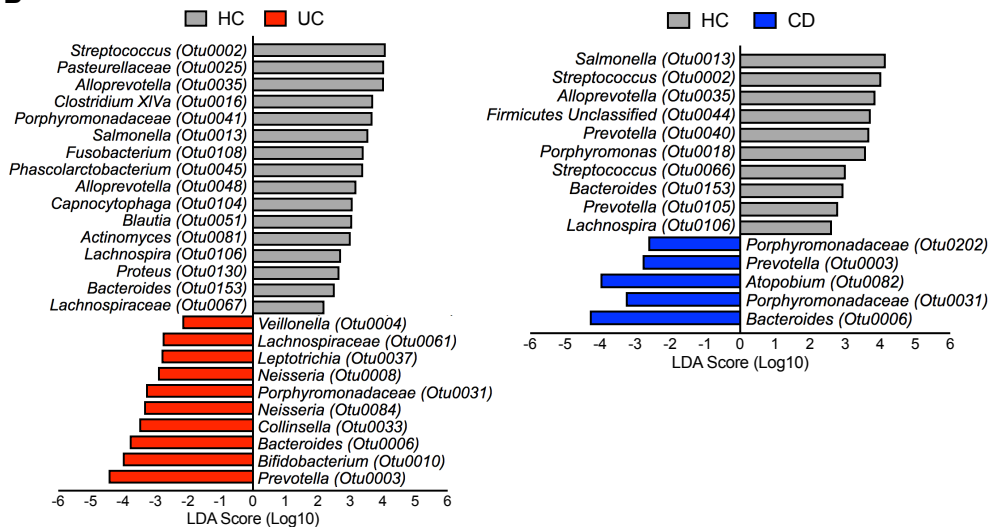

**Supplemental Figure 1. Bacterial taxa differentially abundant in IBD.**

Bacterial taxa significantly enriched in UC or CD compared to HC were identified by LEfSe. (A) Oral microbiota (saliva). (B) Gut microbiota (stool).

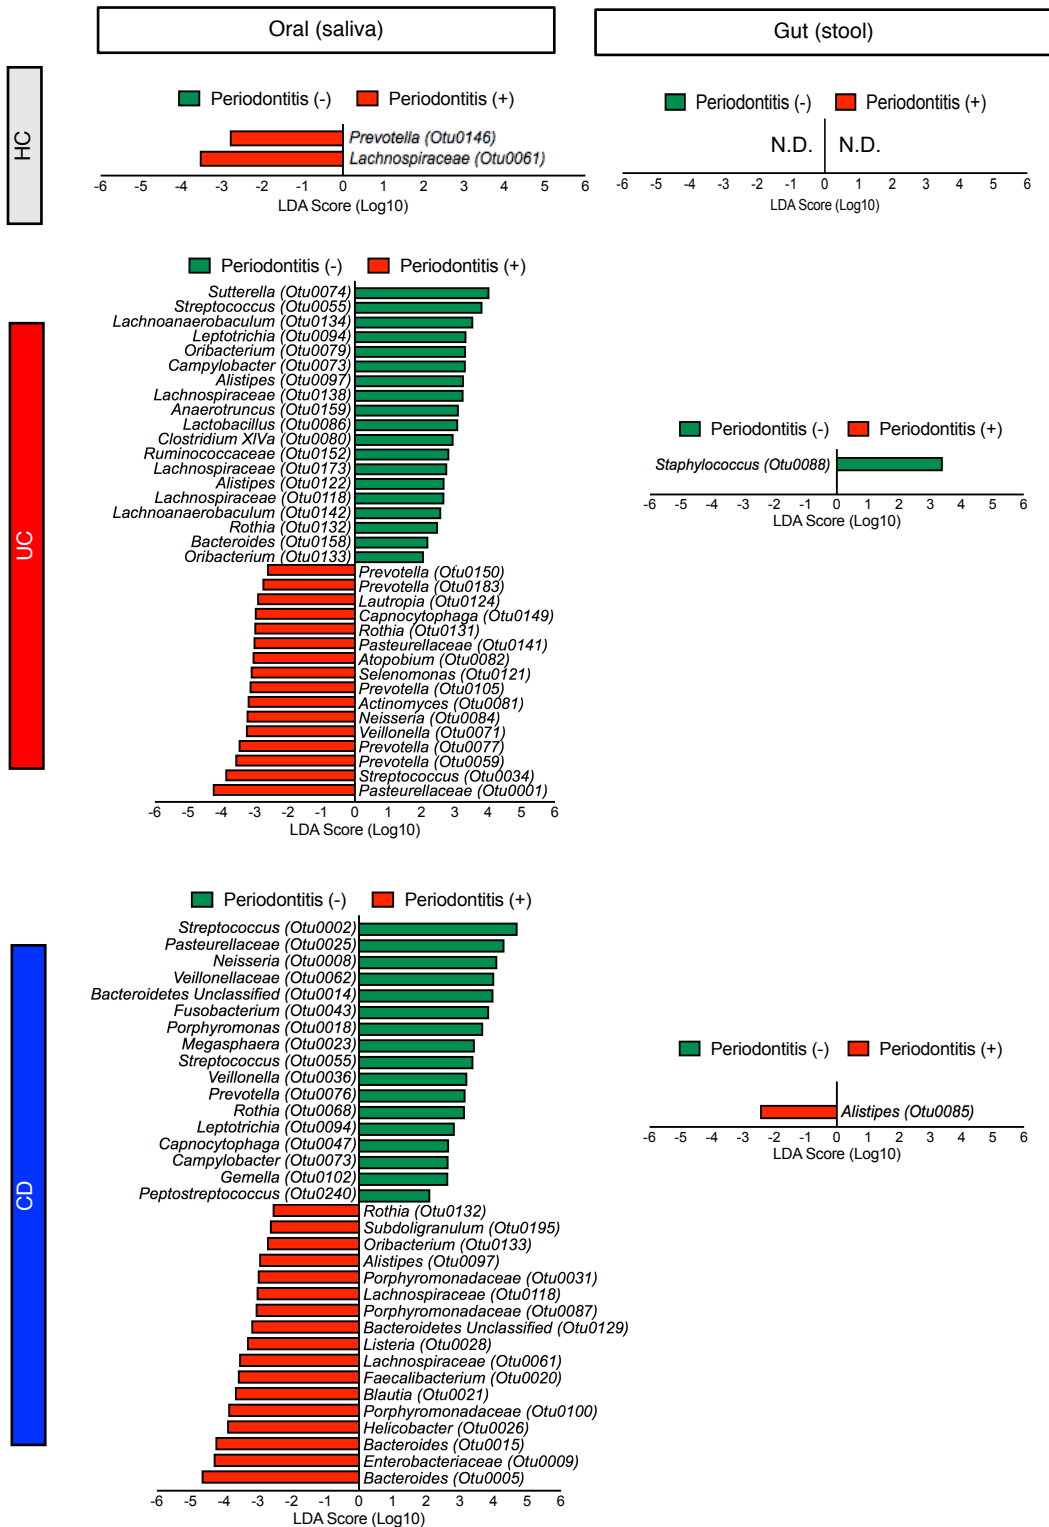

**Supplemental Figure 2. Bacterial taxa differentially abundant in incipient periodontitis.** Bacterial taxa significantly different between the presence and absence of incipient periodontitis were identified by LEfSe. (A) Oral microbiota (saliva). (B) Gut microbiota (stool). N.D.; not detected

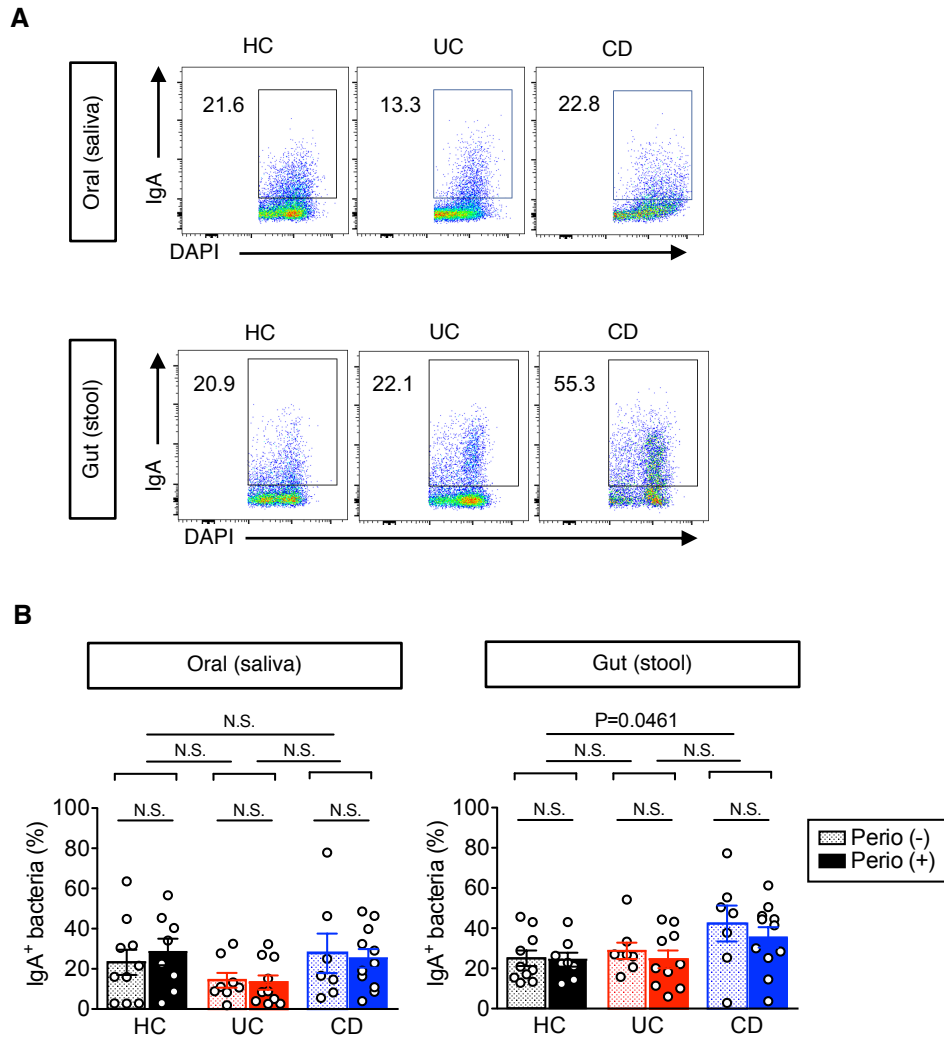

**Supplemental Figure 3. IgA-coated bacteria in the saliva and stool.**

The abundance of IgA-coated bacteria in the stool. (A) Representative FACS plots. (B) Statistical analysis. Results are shown as mean  $\pm$  SD. Dots indicate individual participants (HC = 18, UC = 18, CD = 18). Statistically significant *P* value by 1-way ANOVA followed by Bonferroni post hoc test is shown. N.S., not significant.

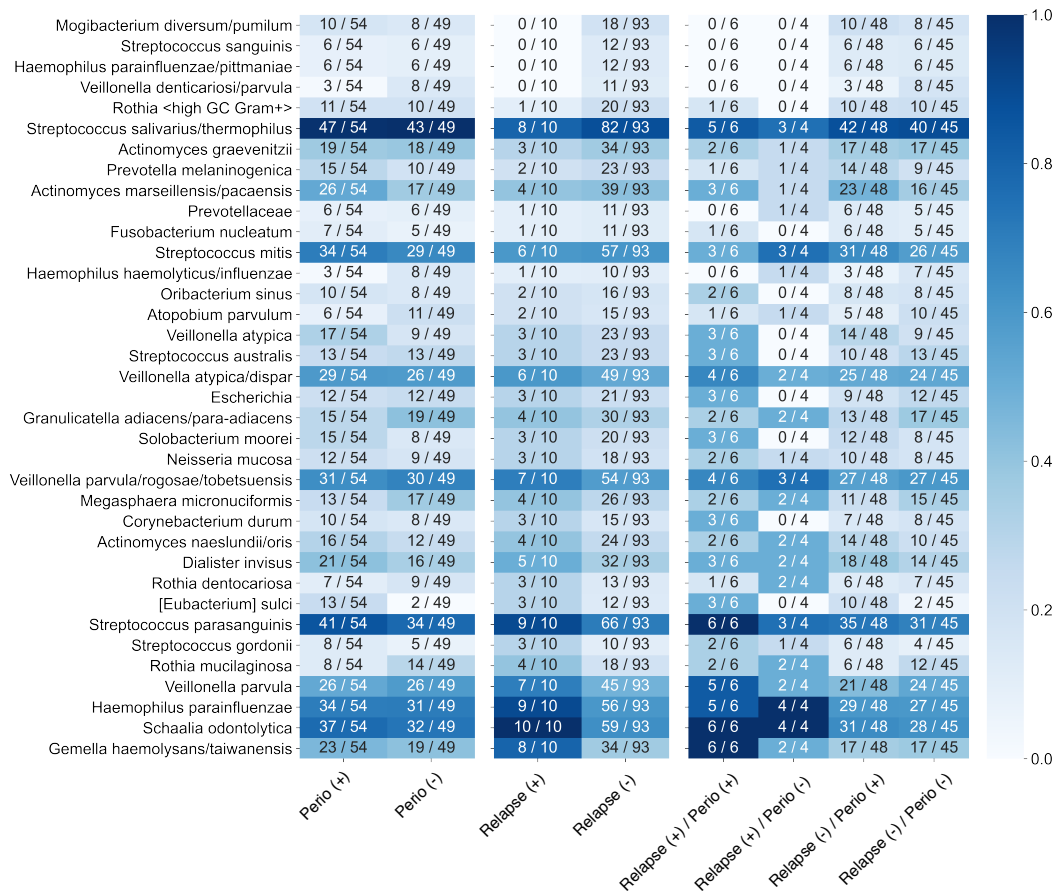

**Supplemental Figure 4. Prevalence of bacterial species shared between the oral and gut microbiome.**

The prevalence of bacterial species commonly colonized in the oral and gut mucosa is shown.



Supplemental Table 2. Clinical features of patients with inflammatory bowel disease

|       | No.               | Mayo score | Disease duration (years) | Disease extent | Steroid | Relapse | Extraintestinal complications (EIM) |     |           |                   |           |          |                  | Treatment history |           |      |     | First diagnosis |         |         |         |
|-------|-------------------|------------|--------------------------|----------------|---------|---------|-------------------------------------|-----|-----------|-------------------|-----------|----------|------------------|-------------------|-----------|------|-----|-----------------|---------|---------|---------|
|       |                   |            |                          |                |         |         | PBC                                 | PSC | Gallstone | Spondyloarthritis | Arthritis | Aphthous | Erythema nodosum | 5-ASA             | thioprine | αTNF | PSL |                 |         |         |         |
| UC    | Periodontitis (+) | UC-01      | 4                        | 7.6            | E3      | SR      |                                     |     |           |                   |           |          |                  |                   | ○         |      | ○   |                 |         | 2010-12 |         |
|       |                   | UC-11      | 1                        | 4.3            | E1      | SF      |                                     |     |           |                   |           |          |                  |                   | ○         |      |     |                 |         | 2014-03 |         |
|       |                   | UC-12      | 1                        | 5.8            | E3      | SD      | ○                                   |     |           |                   |           |          |                  |                   |           | ○    |     |                 | ○       | 2012-08 |         |
|       |                   | UC-14      | 2                        | 6.2            | E3      | SF      |                                     |     |           |                   |           |          |                  |                   |           | ○    |     |                 |         | 2012-05 |         |
|       |                   | UC-15      | 0                        | 4.7            | E3      | SF      |                                     |     |           |                   |           |          |                  |                   |           | ○    |     |                 |         | 2013-11 |         |
|       |                   | UC-16      | 5                        | 2              | E3      | SF      |                                     |     |           |                   |           |          |                  |                   |           | ○    |     |                 |         | 2016-07 |         |
|       |                   | UC-20      | 1                        | 3.3            | E3      | SF      |                                     |     |           |                   |           |          |                  |                   |           | ○    |     |                 |         | 2015-04 |         |
|       |                   | UC-21      | 1                        | 8.9            | E3      | SF      |                                     |     |           |                   |           |          |                  |                   |           | ○    |     |                 |         | 2009-10 |         |
|       |                   | UC-23      | 3                        | 6.6            | E3      | SD      |                                     |     |           |                   |           |          |                  |                   |           | ○    |     |                 | ○       | 2011-11 |         |
|       |                   | UC-24      | 3                        | 0.4            | E3      | SD      |                                     |     |           |                   |           |          |                  |                   |           | ○    |     |                 | ○       | 2018-03 |         |
|       |                   | UC-26      | 0                        | 12.7           | E3      | SF      |                                     |     |           |                   |           |          |                  | ○                 |           |      |     |                 |         | 2005-11 |         |
|       |                   | UC-27      | 1                        | 2.1            | E2      | SF      | ○                                   |     |           |                   |           |          |                  | ○                 |           |      |     |                 |         | 2016-06 |         |
|       |                   | UC-29      | 0                        | 4.2            | E3      | SF      |                                     |     |           |                   |           | ○        |                  |                   | ○         |      |     |                 |         | 2014-06 |         |
|       |                   | UC-31      | 1                        | 2.1            | E3      | SF      |                                     |     |           |                   |           |          |                  |                   | ○         |      |     |                 |         | 2016-09 |         |
|       |                   | UC-34      | 1                        | 8.6            | E1      | SF      |                                     |     |           |                   |           |          |                  |                   | ○         |      |     |                 |         | 2010-01 |         |
|       |                   | UC-35      | 2                        | 16.6           | E2      | SF      |                                     |     |           |                   |           |          |                  |                   | ○         |      |     |                 |         | 2002-02 |         |
|       |                   | UC-36      | 2                        | 11.5           | E3      | SF      |                                     |     |           |                   |           |          |                  |                   | ○         |      |     |                 |         | 2007-02 |         |
|       |                   | UC-39      | 5                        | 9.7            | E2      | SD      | ○                                   |     |           |                   |           |          |                  |                   | ○         |      |     |                 | ○       | 2009-07 |         |
|       |                   | UC-41      | 2                        | 7.4            | E2      | SF      |                                     |     |           |                   |           |          |                  |                   | ○         |      |     |                 |         | 2011-05 |         |
|       |                   | UC-42      | 4                        | 5              | E3      | SF      |                                     |     |           |                   |           |          |                  |                   | ○         |      |     | ○               |         | 2013-09 |         |
|       |                   | UC-43      | 1                        | 15.1           | E3      | SF      |                                     |     |           |                   |           |          |                  |                   | ○         |      |     | ○               |         | 2003-08 |         |
|       |                   | UC-44      | 0                        | 0.3            | E3      | SF      |                                     |     |           |                   |           |          |                  |                   | ○         |      |     |                 |         | 2018-05 |         |
|       |                   | UC-45      | 0                        | 9.2            | E1      | SF      |                                     |     |           |                   |           |          |                  |                   | ○         |      |     |                 |         | 2009-11 |         |
|       |                   | UC         | Periodontitis (-)        | UC-02          | 3       | 19.9    | E3                                  | SD  |           |                   |           |          |                  |                   |           | ○    |     | ○               |         | ○       | 1998-07 |
|       |                   |            |                          | UC-03          | 2       | 1.4     | E3                                  | SD  | ○         |                   |           |          |                  |                   |           | ○    |     | ○               |         |         | 2017-02 |
| UC-04 | 3                 |            |                          | 4              | E3      | SD      |                                     |     |           |                   |           |          |                  |                   | ○         |      |     | ○               | 2014-06 |         |         |
| UC-05 | 2                 |            |                          | 8.8            | E3      | SF      |                                     |     |           |                   |           |          |                  |                   | ○         |      |     |                 | 2009-10 |         |         |
| UC-06 | 4                 |            |                          | 4.7            | E3      | SF      |                                     |     |           |                   |           |          |                  |                   | ○         |      |     |                 | 2013-11 |         |         |
| UC-08 | 0                 |            |                          | 2.6            | E2      | SF      |                                     |     |           |                   |           |          |                  |                   | ○         |      |     |                 |         | 2015-11 |         |
| UC-09 | 1                 |            |                          | 1.1            | E3      | SF      | ○                                   |     |           |                   |           |          |                  |                   | ○         |      |     |                 |         | 2017-04 |         |
| UC-10 | 2                 |            |                          | 1.6            | E3      | SF      |                                     |     |           |                   |           |          |                  |                   | ○         |      |     |                 | ○       | 2016-11 |         |
| UC-13 | 0                 |            |                          | 11.4           | E3      | SF      |                                     |     |           |                   |           |          |                  |                   | ○         |      |     |                 |         | 2007-02 |         |
| UC-17 | 0                 |            |                          | 4.1            | E3      | SD      |                                     |     |           |                   |           |          |                  |                   | ○         |      |     | ○               |         | 2014-05 |         |
| UC-18 | 2                 |            |                          | 8.3            | E3      | SD      |                                     |     |           |                   |           |          |                  |                   | ○         |      |     | ○               |         | 2010-03 |         |
| UC-19 | 5                 |            |                          | 0.5            | E3      | SD      |                                     |     |           |                   |           |          |                  |                   | ○         |      |     |                 | ○       | 2017-12 |         |
| UC-22 | 1                 |            |                          | 2.4            | E3      | SF      |                                     |     |           |                   |           |          |                  |                   | ○         |      |     | ○               |         | 2016-03 |         |
| UC-30 | 1                 |            |                          | 1.7            | E3      | SF      |                                     |     |           |                   |           |          |                  |                   | ○         |      |     |                 |         | 2016-11 |         |
| UC-32 | 3                 |            |                          | 9.2            | E3      | SF      |                                     |     |           |                   |           |          |                  |                   | ○         |      |     |                 |         | 2009-06 |         |
| UC-33 | 0                 |            |                          | 4.4            | E3      | SF      | ○                                   |     |           |                   |           |          |                  |                   | ○         |      |     |                 | ○       | 2014-04 |         |
| UC-37 | 0                 |            |                          | 5.4            | E3      | SF      |                                     |     |           |                   |           |          |                  |                   | ○         |      |     |                 |         | 2013-03 |         |
| UC-38 | 2                 |            |                          | 13.9           | E2      | SF      | ○                                   |     |           |                   |           |          |                  |                   | ○         |      |     |                 |         | 2004-11 |         |
| UC-40 | 0                 |            |                          | 6.3            | E3      | SF      |                                     |     |           |                   |           |          |                  |                   | ○         |      | ○   |                 |         | 2012-06 |         |

Extent: E1: Ulcerative proctitis, E2: Left-side UC, E3: Extensive  
 Steroid: Steroid refractory (SR), Steroid dependent (SD), Steroid free (SF)

| CD    | No.               | Simple CDAI | Disease duration (years) | Disease location | Disease behavior | Resistance to Biologics (RE) | Relapse | Extraintestinal complications (EIM) |              |           |                   |           |          |                  | Treatment history |           |      |     | First diagnosis |         |         |         |
|-------|-------------------|-------------|--------------------------|------------------|------------------|------------------------------|---------|-------------------------------------|--------------|-----------|-------------------|-----------|----------|------------------|-------------------|-----------|------|-----|-----------------|---------|---------|---------|
|       |                   |             |                          |                  |                  |                              |         | PSC                                 | Pancreatitis | Gallstone | Spondyloarthritis | Arthritis | Aphthous | Erythema nodosum | 5-ASA             | thioprine | αTNF | PSL |                 |         |         |         |
| CD    | Periodontitis (+) | CD-01       | 1                        | 15.1             | L1               | B1                           |         |                                     |              |           |                   |           |          |                  |                   | ○         |      | ○   | ○               |         | 2003-06 |         |
|       |                   | CD-02       | 1                        | 2.3              | L3               | B2                           |         | ○                                   |              |           |                   |           |          |                  |                   | ○         |      |     | ○               |         | 2016-04 |         |
|       |                   | CD-03       | 0                        | 1.9              | L3               | B2                           |         | ○                                   |              |           |                   |           |          |                  |                   | ○         |      |     |                 | ○       | 2016-08 |         |
|       |                   | CD-07       | 0                        | 2.1              | L1               | B1                           |         |                                     |              |           |                   |           | ○        |                  |                   | ○         |      |     |                 |         |         | 2016-07 |
|       |                   | CD-10       | 0                        | 6                | L3               | B2                           |         |                                     |              |           |                   |           |          |                  |                   | ○         |      |     |                 | ○       |         | 2012-08 |
|       |                   | CD-12       | 0                        | 1.9              | L3               | B2                           |         |                                     |              |           |                   |           |          |                  |                   | ○         |      |     |                 |         |         | 2016-08 |
|       |                   | CD-13       | 3                        | 17.1             | L3               | B2                           |         |                                     |              |           |                   |           |          |                  |                   | ○         |      |     |                 | ○       |         | 2001-06 |
|       |                   | CD-16       | 2                        | 3.5              | L1               | B2                           |         |                                     |              |           |                   |           |          |                  |                   | ○         |      |     |                 | ○       |         | 2015-02 |
|       |                   | CD-17       | 0                        | 3.2              | L3               | B1                           |         |                                     |              |           |                   |           |          |                  |                   | ○         |      |     |                 | ○       |         | 2015-06 |
|       |                   | CD-19       | 0                        | 4.6              | L3               | B2                           |         |                                     |              |           |                   |           |          |                  |                   | ○         |      | ○   |                 | ○       |         | 2014-01 |
|       |                   | CD-22       | 1                        | 1.1              | L3               | B2                           |         |                                     | ○            |           |                   |           |          |                  |                   | ○         |      | ○   |                 |         | ○       | 2017-07 |
|       |                   | CD-06       | 7                        | 6.7              | L3               | B3                           |         |                                     |              |           |                   |           |          |                  |                   | ○         |      |     |                 | ○       |         | 2011-09 |
|       |                   | CD-08       | 0                        | 7.3              | L2               | B1                           |         |                                     |              |           |                   |           |          |                  |                   | ○         |      |     |                 |         |         | 2011-05 |
|       |                   | CD-14       | 0                        | 6.4              | L3               | B2                           |         |                                     |              |           |                   |           |          |                  |                   | ○         |      | ○   |                 | ○       |         | 2012-02 |
|       |                   | CD-18       | 0                        | 14.6             | L3               | B1                           |         |                                     |              |           |                   |           |          |                  |                   | ○         |      |     |                 | ○       |         | 2004-02 |
| CD-20 | 6                 | 8.8         | L1                       | B2               |                  |                              |         |                                     |              |           |                   |           |          | ○                |                   |           |      | ○   |                 | 2009-11 |         |         |
| CD-24 | 1                 | 17.5        | L3                       | B1               |                  |                              |         |                                     |              |           |                   |           |          | ○                |                   |           |      |     |                 | 2001-05 |         |         |
| CD-25 | 0                 | 4           | L3                       | B2               |                  |                              |         |                                     |              |           |                   |           |          | ○                |                   |           |      |     |                 | 2015-01 |         |         |

Location (L): L1: Terminal ileum, L2: Colon, L3: Ileocolon, L4: Upper GI  
 Behaviour (B): B1: Non-stricturing, non-penetrating, B2: Stricturing, B3: Penetrating

Supplemental Table 3. Clinical course of patients with inflammatory bowel disease

|       |                   | Initial (day 0)         |          | Follo-up visit (1st)  |                              |          |          |          | Follo-up visit (2nd)  |                              |              |          |          | Follo-up visit (3rd)  |                              |       |          |              |           |   |
|-------|-------------------|-------------------------|----------|-----------------------|------------------------------|----------|----------|----------|-----------------------|------------------------------|--------------|----------|----------|-----------------------|------------------------------|-------|----------|--------------|-----------|---|
|       |                   | Dental check (mm/dd/yy) | pMayo    | Visit date (mm/dd/yy) | Interval (days from initial) | pMayo    | Add drug | Relapse  | Visit date (mm/dd/yy) | Interval (days from initial) | pMayo        | Add drug | Relapse  | Visit date (mm/dd/yy) | Interval (days from initial) | pMayo | Add drug | Relapse      | Composite |   |
| UC    | Periodontitis (+) | UC-01                   | 07/09/18 | 4                     | 02/09/18                     | 82       | 2        |          |                       | 12/04/18                     | 148          | 1        |          |                       | 02/03/19                     | 209   | 1        |              |           | + |
|       |                   | UC-11                   | 07/09/18 | 1                     | 09/03/18                     | 56       | 1        |          |                       | 10/15/18                     | 98           | 0        |          |                       | 11/12/18                     | 126   | 0        |              |           | + |
|       |                   | UC-12                   | 06/19/18 | 1                     | 07/03/18                     | 14       | 0        |          |                       | 08/14/18                     | 56           | 0        |          |                       | 10/09/18                     | 112   | 4        | PSL+         | +         | + |
|       |                   | UC-14                   | 07/24/18 | 2                     | 09/18/18                     | 56       | 2        |          |                       | 11/20/18                     | 119          | 2        |          |                       | 01/08/19                     | 168   | 2        |              |           | + |
|       |                   | UC-15                   | 07/31/18 | 0                     | 10/02/18                     | 63       | 3        |          |                       | 12/18/18                     | 140          | 0        |          |                       | 02/25/19                     | 209   | 0        |              |           | + |
|       |                   | UC-16                   | 07/30/18 | 5                     | 09/24/18                     | 56       | 3        |          |                       | 11/04/18                     | 97           | 2        |          |                       | 01/12/19                     | 166   | 1        |              |           | + |
|       |                   | UC-20                   | 08/02/18 | 1                     | 09/20/18                     | 49       | 0        |          |                       | 11/15/18                     | 105          | 0        |          |                       | 01/17/19                     | 168   | 0        |              |           | + |
|       |                   | UC-21                   | 08/27/18 | 1                     | 10/29/18                     | 63       | 0        |          |                       | 12/20/18                     | 115          | 0        |          |                       | 02/21/19                     | 178   | 0        |              |           | + |
|       |                   | UC-23                   | 06/30/18 | 3                     | 09/04/18                     | 66       | 1        |          |                       | 12/03/18                     | 156          | 1        |          |                       | 02/05/19                     | 220   | 1        |              |           | + |
|       |                   | UC-24                   | 08/25/18 | 3                     | 11/04/18                     | 71       | 1        |          |                       | 01/12/19                     | 140          | 1        |          |                       | 03/22/19                     | 209   | 1        |              |           | + |
|       |                   | UC-26                   | 07/17/18 | 0                     | 09/14/18                     | 28       | 0        |          |                       | 09/11/18                     | 56           | 6        |          |                       | 09/18/18                     | 63    | 2        |              |           | + |
|       |                   | UC-27                   | 07/17/18 | 1                     | 09/10/18                     | 55       | 3        | 5-ASA up | +                     | 11/02/18                     | 108          | 2        |          |                       | 02/03/19                     | 201   | 1        |              | +         | + |
|       |                   | UC-29                   | 08/21/18 | 0                     | 10/16/18                     | 56       | 0        |          |                       | 12/11/18                     | 112          | 0        |          |                       | 02/05/19                     | 168   | 0        |              |           | + |
|       |                   | UC-31                   | 10/11/18 | 1                     | 12/06/18                     | 56       | 1        |          |                       | 02/03/19                     | 115          | 1        |          |                       | 04/26/19                     | 197   | 0        |              |           | + |
|       |                   | UC-34                   | 09/04/18 | 1                     | 11/13/18                     | 70       | 0        |          |                       | 01/29/19                     | 147          | 0        |          |                       | 03/12/19                     | 189   | 0        |              |           | + |
|       |                   | UC-35                   | 09/04/18 | 2                     | 11/06/18                     | 63       | 2        |          |                       | 01/22/19                     | 140          | 2        |          |                       | 03/26/19                     | 203   | 2        |              |           | + |
|       |                   | UC-36                   | 09/08/18 | 2                     | 11/15/18                     | 68       | 2        |          |                       | 01/26/19                     | 140          | 2        |          |                       | 04/13/19                     | 217   | 2        |              |           | + |
|       |                   | UC-39                   | 03/20/19 | 5                     | 05/14/19                     | 55       | 0        |          |                       | 07/09/19                     | 111          | 0        |          |                       | 07/22/19                     | 124   | 4        | rectum 5-ASA | +         | + |
|       |                   | UC-41                   | 09/22/18 | 2                     | 11/24/18                     | 63       | 2        |          |                       | 01/26/19                     | 126          | 2        |          |                       | 03/30/19                     | 189   | 2        |              |           | + |
|       |                   | UC-42                   | 10/02/18 | 4                     | 11/27/18                     | 56       | 0        |          |                       | 01/22/19                     | 112          | 0        |          |                       | 03/19/19                     | 168   | 0        |              |           | + |
|       |                   | UC-43                   | 09/06/18 | 1                     | 10/18/18                     | 42       | 0        |          |                       | 11/15/18                     | 70           | 0        |          |                       | 01/10/19                     | 126   | 3        |              |           | + |
|       |                   | UC-44                   | 09/18/18 | 0                     | 12/22/18                     | 95       | 0        |          |                       | 02/04/19                     | 139          | 0        |          |                       | 04/27/19                     | 221   | 0        |              |           | + |
|       |                   | UC-45                   | 01/21/19 | 0                     | 03/18/19                     | 56       | 0        |          |                       | 05/27/19                     | 126          | 0        |          |                       | 07/22/19                     | 182   | 0        |              |           | + |
|       |                   | UC-02                   | 05/31/18 | 3                     | 07/22/18                     | 52       | 2        |          |                       | 09/24/18                     | 116          | 0        |          |                       | 12/13/18                     | 196   | 0        |              |           | + |
|       |                   | UC-03                   | 07/10/18 | 2                     | 09/04/18                     | 56       | 3        | SASP+    | +                     | 11/26/18                     | 139          | 1        |          |                       | 02/03/19                     | 208   | 0        |              |           | + |
| UC-04 | 06/12/18          | 3                       | 09/03/18 | 83                    | 2                            |          |          | 11/20/18 | 161                   | 1                            |              |          | 02/03/19 | 236                   | 0                            |       |          | +            |           |   |
| UC-05 | 07/28/18          | 2                       | 10/03/18 | 67                    | 1                            |          |          | 12/11/18 | 136                   | 0                            |              |          | 02/06/19 | 193                   | 0                            |       |          | +            |           |   |
| UC-06 | 07/28/18          | 4                       | 09/29/18 | 63                    | 2                            |          |          | 10/27/18 | 91                    | 2                            |              |          | 11/27/18 | 122                   | 4                            |       |          | +            |           |   |
| UC-08 | 07/13/18          | 0                       | 08/06/18 | 24                    | 0                            |          |          | 09/04/18 | 53                    | 0                            |              |          | 10/29/18 | 108                   | 1                            |       |          | +            |           |   |
| UC-09 | 06/04/18          | 1                       | 07/03/18 | 29                    | 4                            | 5-ASA up | +        | 08/25/18 | 82                    | 2                            |              |          | 10/04/18 | 122                   | 1                            |       |          | +            |           |   |
| UC-10 | 06/26/18          | 2                       | 09/03/18 | 69                    | 0                            |          |          | 12/04/18 | 161                   | 0                            |              |          | 02/06/19 | 225                   | 0                            |       |          | +            |           |   |
| UC-13 | 07/30/18          | 0                       | 10/01/18 | 63                    | 0                            |          |          | 12/03/18 | 126                   | 0                            |              |          | 01/21/19 | 175                   | 0                            |       |          | +            |           |   |
| UC-17 | 07/02/18          | 0                       | 08/20/18 | 49                    | 0                            |          |          | 10/01/18 | 91                    | 0                            |              |          | 12/17/18 | 168                   | 0                            |       |          | +            |           |   |
| UC-18 | 06/30/18          | 2                       | 08/21/18 | 52                    | 0                            |          |          | 10/16/18 | 108                   | 0                            |              |          | 11/20/18 | 143                   | 1                            |       |          | +            |           |   |
| UC-19 | 06/11/18          | 5                       | 07/08/18 | 27                    | 3                            |          |          | 10/03/18 | 114                   | 2                            |              |          | 12/26/18 | 198                   | 1                            |       |          | +            |           |   |
| UC-22 | 08/30/18          | 1                       | 10/25/18 | 56                    | 0                            |          |          | 11/29/18 | 91                    | 0                            |              |          | 02/14/19 | 168                   | 1                            |       |          | +            |           |   |
| UC-30 | 07/17/18          | 1                       | 09/11/18 | 56                    | 0                            |          |          | 10/30/18 | 105                   | 0                            |              |          | 12/17/18 | 153                   | 0                            |       |          | +            |           |   |
| UC-32 | 08/28/18          | 3                       |          |                       |                              |          |          |          |                       |                              |              |          |          |                       |                              |       |          |              | +         |   |
| UC-33 | 09/10/18          | 0                       | 11/19/18 | 70                    | 0                            |          |          | 01/21/19 | 133                   | 5                            | rectum 5-ASA | +        | 02/25/19 | 168                   | 3                            |       | +        | +            |           |   |
| UC-37 | 08/14/18          | 0                       | 09/22/18 | 39                    | 2                            |          |          | 11/22/18 | 100                   | 1                            |              |          | 01/15/19 | 154                   | 1                            |       |          | +            |           |   |
| UC-38 | 09/25/18          | 2                       | 11/27/18 | 63                    | 6                            | PSL up   | +        |          |                       |                              |              |          |          |                       |                              |       |          | +            |           |   |
| UC-40 | 09/19/18          | 0                       | 12/05/18 | 77                    | 0                            |          |          | 02/19/19 | 153                   | 0                            |              |          |          |                       |                              |       |          | +            |           |   |

|    |                   | Initial (day 0)         |          | Follo-up visit (1st)  |                              |       |          |         | Follo-up visit (2nd)  |                              |       |          |         | Follo-up visit (3rd)  |                              |       |          |         |           |   |
|----|-------------------|-------------------------|----------|-----------------------|------------------------------|-------|----------|---------|-----------------------|------------------------------|-------|----------|---------|-----------------------|------------------------------|-------|----------|---------|-----------|---|
|    |                   | Dental check (mm/dd/yy) | pMayo    | Visit date (mm/dd/yy) | Interval (days from initial) | pMayo | Add drug | Relapse | Visit date (mm/dd/yy) | Interval (days from initial) | pMayo | Add drug | Relapse | Visit date (mm/dd/yy) | Interval (days from initial) | pMayo | Add drug | Relapse | Composite |   |
| CD | Periodontitis (+) | CD-01                   | 07/04/18 | 1                     | 08/29/18                     | 56    | 0        |         |                       | 10/24/18                     | 112   | 0        |         |                       | 12/19/18                     | 168   | 0        |         |           | + |
|    |                   | CD-02                   | 07/30/18 | 1                     | 08/13/18                     | 14    | 6        | aTNF up | +                     | 09/15/18                     | 47    | 5        |         |                       | 11/04/18                     | 97    | 4        |         |           | + |
|    |                   | CD-03                   | 07/10/18 | 0                     | 09/04/18                     | 56    | 0        |         |                       | 11/06/18                     | 119   | 5        | PSL +   | +                     | 12/16/18                     | 159   | 3        |         |           | + |
|    |                   | CD-07                   | 08/13/18 | 0                     | 10/09/18                     | 57    | 0        |         |                       | 12/04/18                     | 113   | 0        |         |                       | 02/05/19                     | 176   | 0        |         |           | + |
|    |                   | CD-10                   | 08/14/18 | 0                     | 10/09/18                     | 56    | 0        |         |                       | 12/18/18                     | 126   | 0        |         |                       | 01/18/19                     | 157   | 0        |         |           | + |
|    |                   | CD-12                   | 07/31/18 | 0                     | 09/18/18                     | 49    | 0        |         |                       | 10/23/18                     | 84    | 0        |         |                       | 01/13/19                     | 166   | 1        |         |           | + |
|    |                   | CD-13                   | 08/08/18 | 3                     | 09/25/18                     | 48    | 0        |         |                       | 11/14/18                     | 98    | 0        |         |                       | 01/09/19                     | 154   | 1        |         |           | + |
|    |                   | CD-16                   | 08/28/18 | 2                     | 10/23/18                     | 56    | 2        |         |                       | 12/18/18                     | 112   | 0        |         |                       | 02/12/19                     | 168   | 2        |         |           | + |
|    |                   | CD-17                   | 08/21/18 | 0                     | 10/16/18                     | 56    | 0        |         |                       | 12/04/18                     | 105   | 0        |         |                       | 01/29/19                     | 161   | 0        |         |           | + |
|    |                   | CD-19                   | 08/29/18 | 0                     | 10/31/18                     | 63    | 0        |         |                       | 12/26/18                     | 119   | 0        |         |                       | 02/08/19                     | 163   | 0        |         |           | + |
|    |                   | CD-22                   | 08/25/18 | 1                     | 09/29/18                     | 35    | 3        |         |                       | 11/01/18                     | 68    | 5        | PSL +   | +                     | 02/18/19                     | 177   | 2        |         |           | + |
|    |                   | CD-06                   | 06/12/18 | 7                     | 09/12/18                     | 92    | 4        |         |                       | 11/15/18                     | 156   | 3        |         |                       | 01/25/19                     | 227   | 1        |         |           | + |
|    |                   | CD-08                   | 09/08/18 | 0                     | 12/08/18                     | 91    | 0        |         |                       | 03/09/19                     | 182   | 0        |         |                       | 05/30/19                     | 264   | 0        |         |           | + |
|    |                   | CD-14                   | 07/28/18 | 0                     | 10/13/18                     | 77    | 0        |         |                       | 12/08/18                     | 133   | 0        |         |                       | 02/03/19                     | 190   | 0        |         |           | + |
|    |                   | CD-18                   | 09/22/18 | 0                     | 10/27/18                     | 35    | 0        |         |                       | 12/22/18                     | 91    | 0        |         |                       | 03/09/19                     | 168   | 0        |         |           | + |
|    | CD-20             | 08/22/18                | 6        | 11/02/18              | 72                           | 0     |          |         | 02/14/19              | 176                          | 0     |          |         | 05/25/19              | 276                          | 1     |          |         | +         |   |
|    | CD-24             | 11/05/18                | 1        | 01/28/19              | 84                           | 0     |          |         | 04/22/19              | 168                          | 0     |          |         | 07/23/19              | 260                          | 0     |          |         | +         |   |
|    | CD-25             | 01/08/19                | 0        | 03/05/19              | 56                           | 2     |          |         | 06/18/19              | 161                          | 0     |          |         | 08/13/19              | 217                          | 0     |          |         | +         |   |
